# Supplementary figures and images for: Holocene sea level and environmental change at the southern Cape –an 8.5 kyr multi-proxy paleoclimate record from lake Voёlvlei, SouthAfrica
Source: Copernicus journal article supplement (doi:10.5194/cp-2020-130), 2020-10-26

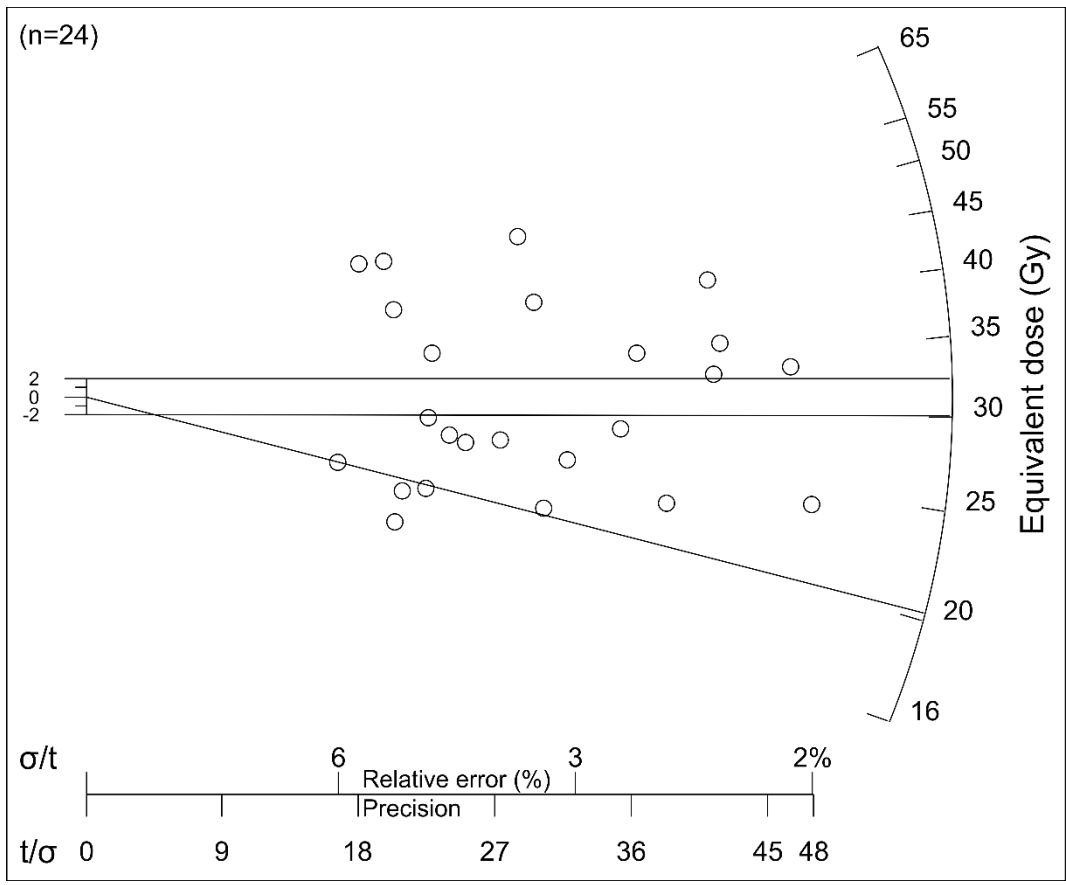

S1: Radial plot showing the De distribution of the OSL sample.

Supplement: Supplementary file 1 [file cp-2020-130-supplement.pdf]
